# Supplementary material for: Computational Nanochemistry Study of the Molecular Structure and Properties of Chlorophyll a
Source: Hindawi journal article supplement (doi:10.1155/2013/424620), 2013-01-01
Supplement: f1 [file 424620.f1.pdf]

## Supplementary Materials

Table A.1: Optimized bond distances (in Å) of the chlorophyll a molecule calculated with the M06, M06L, M06-2X and M06-HF density functionals and the MIDIY and DGDZVP basis sets

|          | M06   | M06L  | M06-2X | M06-HF |
|----------|-------|-------|--------|--------|
| R(2-3)   | 1.211 | 1.222 | 1.214  | 1.205  |
| R(3-4)   | 1.460 | 1.461 | 1.471  | 1.468  |
| R(4-6)   | 1.378 | 1.389 | 1.381  | 1.379  |
| R(4-7)   | 1.416 | 1.422 | 1.423  | 1.416  |
| R(5-8)   | 1.511 | 1.517 | 1.518  | 1.527  |
| R(5-9)   | 1.523 | 1.528 | 1.532  | 1.539  |
| R(5-66)  | 1.099 | 1.097 | 1.097  | 1.089  |
| R(6-10)  | 1.487 | 1.492 | 1.500  | 1.511  |
| R(6-11)  | 1.449 | 1.455 | 1.455  | 1.441  |
| R(7-9)   | 1.403 | 1.405 | 1.412  | 1.436  |
| R(7-12)  | 1.333 | 1.344 | 1.335  | 1.323  |
| R(8-13)  | 1.353 | 1.366 | 1.354  | 1.345  |
| R(8-14)  | 1.217 | 1.228 | 1.222  | 1.214  |
| R(9-15)  | 1.368 | 1.378 | 1.367  | 1.351  |
| R(10-67) | 1.103 | 1.101 | 1.100  | 1.095  |
| R(10-68) | 1.099 | 1.097 | 1.097  | 1.093  |
| R(10-69) | 1.103 | 1.102 | 1.100  | 1.095  |
| R(11-12) | 1.398 | 1.405 | 1.406  | 1.402  |
| R(11-16) | 1.387 | 1.395 | 1.390  | 1.392  |
| R(13-17) | 1.441 | 1.455 | 1.450  | 1.452  |
| R(15-18) | 1.515 | 1.519 | 1.524  | 1.540  |
| R(15-19) | 1.374 | 1.380 | 1.384  | 1.410  |
| R(16-20) | 1.397 | 1.402 | 1.402  | 1.390  |
| R(16-70) | 1.093 | 1.091 | 1.091  | 1.086  |
| R(17-71) | 1.099 | 1.097 | 1.097  | 1.092  |
| R(17-72) | 1.098 | 1.097 | 1.096  | 1.091  |
| R(17-73) | 1.095 | 1.093 | 1.093  | 1.090  |
| R(18-21) | 1.557 | 1.563 | 1.563  | 1.560  |
| R(18-22) | 1.552 | 1.561 | 1.563  | 1.555  |
| R(18-74) | 1.100 | 1.100 | 1.099  | 1.097  |
| R(19-23) | 1.361 | 1.371 | 1.363  | 1.341  |
| R(20-24) | 1.381 | 1.391 | 1.389  | 1.393  |
| R(20-25) | 1.445 | 1.452 | 1.450  | 1.448  |
| R(21-23) | 1.528 | 1.534 | 1.538  | 1.531  |
| R(21-26) | 1.529 | 1.536 | 1.541  | 1.561  |
| R(21-75) | 1.104 | 1.101 | 1.100  | 1.090  |
| R(22-27) | 1.529 | 1.534 | 1.539  | 1.551  |

*Continued on next page*

Table A.1 – Continued from the previous page

|          | M06   | M06L  | M06-2X | M06-HF |
|----------|-------|-------|--------|--------|
| R(22-76) | 1.098 | 1.096 | 1.095  | 1.092  |
| R(22-77) | 1.099 | 1.099 | 1.097  | 1.094  |
| R(23-28) | 1.380 | 1.386 | 1.385  | 1.393  |
| R(24-29) | 1.367 | 1.378 | 1.367  | 1.346  |
| R(25-30) | 1.370 | 1.376 | 1.373  | 1.369  |
| R(25-31) | 1.493 | 1.497 | 1.503  | 1.508  |
| R(26-78) | 1.100 | 1.099 | 1.098  | 1.094  |
| R(26-79) | 1.099 | 1.098 | 1.097  | 1.096  |
| R(26-80) | 1.100 | 1.099 | 1.099  | 1.093  |
| R(27-32) | 1.520 | 1.524 | 1.527  | 1.537  |
| R(27-81) | 1.103 | 1.103 | 1.102  | 1.094  |
| R(27-82) | 1.104 | 1.102 | 1.099  | 1.095  |
| R(28-33) | 1.403 | 1.408 | 1.407  | 1.394  |
| R(28-83) | 1.091 | 1.089 | 1.088  | 1.084  |
| R(29-30) | 1.443 | 1.450 | 1.448  | 1.447  |
| R(29-34) | 1.403 | 1.405 | 1.414  | 1.433  |
| R(30-35) | 1.490 | 1.495 | 1.503  | 1.512  |
| R(31-36) | 1.542 | 1.551 | 1.555  | 1.563  |
| R(31-84) | 1.102 | 1.101 | 1.100  | 1.094  |
| R(31-85) | 1.101 | 1.100 | 1.098  | 1.094  |
| R(32-37) | 1.209 | 1.220 | 1.212  | 1.208  |
| R(32-38) | 1.366 | 1.377 | 1.371  | 1.360  |
| R(33-39) | 1.363 | 1.377 | 1.363  | 1.349  |
| R(33-40) | 1.448 | 1.448 | 1.462  | 1.482  |
| R(34-41) | 1.381 | 1.392 | 1.379  | 1.359  |
| R(34-86) | 1.092 | 1.091 | 1.089  | 1.084  |
| R(35-87) | 1.103 | 1.102 | 1.101  | 1.096  |
| R(35-88) | 1.099 | 1.098 | 1.097  | 1.093  |
| R(35-89) | 1.103 | 1.101 | 1.100  | 1.096  |
| R(36-90) | 1.101 | 1.099 | 1.098  | 1.094  |
| R(36-91) | 1.101 | 1.099 | 1.099  | 1.095  |
| R(36-92) | 1.100 | 1.099 | 1.098  | 1.094  |
| R(38-42) | 1.451 | 1.473 | 1.459  | 1.464  |
| R(39-41) | 1.384 | 1.389 | 1.394  | 1.396  |
| R(40-43) | 1.489 | 1.492 | 1.501  | 1.508  |
| R(40-44) | 1.373 | 1.385 | 1.370  | 1.350  |
| R(41-44) | 1.454 | 1.459 | 1.465  | 1.479  |
| R(42-45) | 1.501 | 1.503 | 1.513  | 1.521  |
| R(42-93) | 1.100 | 1.098 | 1.098  | 1.091  |
| R(42-94) | 1.105 | 1.103 | 1.101  | 1.094  |
| R(43-95) | 1.100 | 1.101 | 1.099  | 1.093  |
| R(43-96) | 1.104 | 1.102 | 1.101  | 1.096  |
| R(43-97) | 1.101 | 1.099 | 1.099  | 1.096  |

*Continued on next page*

Table A.1 – Continued from the previous page

|           | M06   | M06L  | M06-2X | M06-HF |
|-----------|-------|-------|--------|--------|
| R(44-46)  | 1.449 | 1.447 | 1.462  | 1.472  |
| R(45-47)  | 1.334 | 1.342 | 1.335  | 1.328  |
| R(45-98)  | 1.093 | 1.091 | 1.090  | 1.085  |
| R(46-48)  | 1.337 | 1.348 | 1.339  | 1.333  |
| R(46-99)  | 1.095 | 1.093 | 1.092  | 1.086  |
| R(47-49)  | 1.506 | 1.510 | 1.519  | 1.528  |
| R(47-50)  | 1.503 | 1.508 | 1.514  | 1.519  |
| R(48-100) | 1.091 | 1.089 | 1.089  | 1.084  |
| R(48-101) | 1.091 | 1.089 | 1.089  | 1.086  |
| R(49-102) | 1.097 | 1.096 | 1.095  | 1.092  |
| R(49-103) | 1.104 | 1.102 | 1.102  | 1.097  |
| R(49-104) | 1.101 | 1.101 | 1.100  | 1.095  |
| R(50-51)  | 1.543 | 1.549 | 1.553  | 1.559  |
| R(50-105) | 1.102 | 1.100 | 1.099  | 1.095  |
| R(50-106) | 1.106 | 1.105 | 1.103  | 1.098  |
| R(51-52)  | 1.532 | 1.539 | 1.544  | 1.550  |
| R(51-107) | 1.104 | 1.102 | 1.101  | 1.097  |
| R(51-108) | 1.102 | 1.101 | 1.099  | 1.094  |
| R(52-53)  | 1.539 | 1.546 | 1.549  | 1.552  |
| R(52-109) | 1.104 | 1.102 | 1.102  | 1.097  |
| R(52-110) | 1.106 | 1.104 | 1.103  | 1.098  |
| R(53-54)  | 1.534 | 1.541 | 1.545  | 1.551  |
| R(53-55)  | 1.539 | 1.547 | 1.549  | 1.552  |
| R(53-111) | 1.105 | 1.103 | 1.102  | 1.097  |
| R(54-112) | 1.100 | 1.098 | 1.098  | 1.094  |
| R(54-113) | 1.100 | 1.099 | 1.098  | 1.094  |
| R(54-114) | 1.104 | 1.102 | 1.102  | 1.098  |
| R(55-56)  | 1.534 | 1.540 | 1.546  | 1.552  |
| R(55-115) | 1.104 | 1.103 | 1.102  | 1.097  |
| R(55-116) | 1.106 | 1.104 | 1.103  | 1.098  |
| R(56-57)  | 1.533 | 1.541 | 1.545  | 1.552  |
| R(56-117) | 1.105 | 1.103 | 1.102  | 1.097  |
| R(56-118) | 1.101 | 1.100 | 1.098  | 1.093  |
| R(57-58)  | 1.539 | 1.546 | 1.549  | 1.552  |
| R(57-119) | 1.105 | 1.103 | 1.102  | 1.097  |
| R(57-120) | 1.106 | 1.104 | 1.103  | 1.098  |
| R(58-59)  | 1.539 | 1.546 | 1.548  | 1.551  |
| R(58-60)  | 1.534 | 1.541 | 1.545  | 1.550  |
| R(58-121) | 1.105 | 1.103 | 1.102  | 1.096  |
| R(59-61)  | 1.535 | 1.541 | 1.546  | 1.552  |
| R(59-122) | 1.105 | 1.103 | 1.102  | 1.098  |
| R(59-123) | 1.106 | 1.104 | 1.103  | 1.098  |
| R(60-124) | 1.100 | 1.099 | 1.098  | 1.094  |

*Continued on next page*

Table A.1 – Continued from the previous page

|           | M06   | M06L  | M06-2X | M06-HF |
|-----------|-------|-------|--------|--------|
| R(60-125) | 1.100 | 1.099 | 1.098  | 1.094  |
| R(60-126) | 1.104 | 1.102 | 1.101  | 1.097  |
| R(61-62)  | 1.534 | 1.541 | 1.546  | 1.552  |
| R(61-127) | 1.104 | 1.102 | 1.101  | 1.096  |
| R(61-128) | 1.102 | 1.101 | 1.099  | 1.093  |
| R(62-63)  | 1.541 | 1.548 | 1.551  | 1.553  |
| R(62-129) | 1.105 | 1.103 | 1.102  | 1.097  |
| R(62-130) | 1.105 | 1.102 | 1.102  | 1.098  |
| R(63-64)  | 1.534 | 1.542 | 1.546  | 1.551  |
| R(63-65)  | 1.534 | 1.541 | 1.545  | 1.551  |
| R(63-131) | 1.103 | 1.101 | 1.100  | 1.094  |
| R(64-132) | 1.101 | 1.100 | 1.099  | 1.095  |
| R(64-133) | 1.102 | 1.100 | 1.100  | 1.095  |
| R(64-134) | 1.101 | 1.099 | 1.099  | 1.095  |
| R(65-135) | 1.101 | 1.100 | 1.100  | 1.096  |
| R(65-136) | 1.102 | 1.100 | 1.100  | 1.095  |
| R(65-137) | 1.101 | 1.099 | 1.099  | 1.095  |

Table A.2: Optimized bond angles (in degrees) of the chlorophyll a molecule calculated with the M06, M06L, M06-2X and M06-HF density functionals and the MIDIY and DGDZVP basis sets

|            | M06   | M06L  | M06-2X | M06-HF |
|------------|-------|-------|--------|--------|
| A(2-3-4)   | 131.5 | 131.6 | 131.6  | 131.3  |
| A(3-4-6)   | 143.7 | 143.5 | 143.5  | 143.9  |
| A(3-4-7)   | 109.2 | 109.5 | 109.5  | 108.9  |
| A(6-4-7)   | 107.1 | 107.0 | 107.0  | 107.2  |
| A(4-6-10)  | 127.2 | 127.5 | 127.5  | 127.3  |
| A(4-6-11)  | 105.4 | 105.2 | 105.3  | 105.0  |
| A(4-7-9)   | 114.4 | 114.4 | 114.3  | 114.2  |
| A(4-7-12)  | 112.1 | 112.4 | 112.3  | 111.7  |
| A(8-5-9)   | 111.8 | 112.7 | 112.3  | 109.4  |
| A(8-5-66)  | 107.7 | 107.9 | 108.1  | 111.1  |
| A(5-8-13)  | 109.4 | 109.1 | 109.8  | 109.9  |
| A(5-8-14)  | 126.8 | 127.6 | 127.0  | 127.8  |
| A(9-5-66)  | 114.2 | 114.3 | 114.5  | 117.4  |
| A(5-9-7)   | 106.8 | 107.2 | 107.0  | 105.6  |
| A(5-9-15)  | 128.5 | 128.2 | 128.6  | 130.5  |
| A(10-6-11) | 127.4 | 127.2 | 127.4  | 128.0  |
| A(6-10-67) | 111.9 | 112.0 | 111.6  | 111.0  |
| A(6-10-68) | 109.5 | 109.7 | 109.0  | 108.3  |

*Continued on next page*

Table A.2 – Continued from the previous page

|             | M06   | M06L  | M06-2X | M06-HF |
|-------------|-------|-------|--------|--------|
| A(6-10-69)  | 111.9 | 111.9 | 111.6  | 111.1  |
| A(6-11-12)  | 109.5 | 109.9 | 109.6  | 109.5  |
| A(6-11-16)  | 129.0 | 128.9 | 128.9  | 128.7  |
| A(9-7-12)   | 133.5 | 133.2 | 133.4  | 134.1  |
| A(7-9-15)   | 124.7 | 124.6 | 124.3  | 123.8  |
| A(7-12-11)  | 105.9 | 105.4 | 105.7  | 106.2  |
| A(13-8-14)  | 123.8 | 123.3 | 123.2  | 122.2  |
| A(8-13-17)  | 113.4 | 112.5 | 112.9  | 113.7  |
| A(9-15-18)  | 125.3 | 124.9 | 124.9  | 128.4  |
| A(9-15-19)  | 122.6 | 122.4 | 122.8  | 121.4  |
| A(67-10-68) | 108.3 | 108.3 | 108.6  | 108.8  |
| A(67-10-69) | 106.9 | 106.7 | 107.5  | 108.5  |
| A(68-10-69) | 108.2 | 108.1 | 108.5  | 109.0  |
| A(12-11-16) | 121.5 | 121.1 | 121.4  | 121.8  |
| A(11-16-20) | 126.4 | 126.2 | 126.2  | 126.7  |
| A(11-16-70) | 116.9 | 117.2 | 117.1  | 116.6  |
| A(13-17-71) | 110.8 | 110.4 | 110.2  | 109.8  |
| A(13-17-72) | 110.7 | 110.3 | 110.2  | 109.8  |
| A(13-17-73) | 105.4 | 105.1 | 105.3  | 105.0  |
| A(18-15-19) | 112.1 | 112.6 | 112.3  | 110.2  |
| A(15-18-21) | 101.8 | 102.0 | 101.9  | 101.1  |
| A(15-18-22) | 110.4 | 110.7 | 110.5  | 114.4  |
| A(15-18-74) | 109.8 | 109.6 | 109.4  | 107.9  |
| A(15-19-23) | 109.7 | 109.3 | 109.5  | 109.8  |
| A(20-16-70) | 116.7 | 116.6 | 116.7  | 116.8  |
| A(16-20-24) | 125.0 | 125.2 | 125.2  | 125.2  |
| A(16-20-25) | 125.7 | 125.1 | 125.4  | 125.9  |
| A(71-17-72) | 108.7 | 108.8 | 109.1  | 109.7  |
| A(71-17-73) | 110.6 | 111.0 | 111.0  | 111.2  |
| A(72-17-73) | 110.6 | 111.2 | 111.1  | 111.2  |
| A(21-18-22) | 116.4 | 116.6 | 116.7  | 114.8  |
| A(21-18-74) | 110.4 | 109.9 | 110.1  | 107.9  |
| A(18-21-23) | 102.8 | 102.9 | 102.8  | 102.2  |
| A(18-21-26) | 117.0 | 116.7 | 116.6  | 113.7  |
| A(18-21-75) | 107.5 | 107.8 | 107.9  | 112.0  |
| A(22-18-74) | 108.0 | 107.8 | 108.0  | 110.0  |
| A(18-22-27) | 111.3 | 111.1 | 110.6  | 113.8  |
| A(18-22-76) | 112.0 | 111.9 | 112.3  | 109.6  |
| A(18-22-77) | 110.3 | 110.1 | 110.2  | 110.4  |
| A(19-23-21) | 111.1 | 111.6 | 111.6  | 111.5  |
| A(19-23-28) | 125.6 | 125.6 | 125.9  | 127.8  |
| A(24-20-25) | 109.3 | 109.7 | 109.4  | 108.9  |
| A(20-24-29) | 106.9 | 106.4 | 106.6  | 106.9  |

*Continued on next page*

Table A.2 – Continued from the previous page

|             | M06   | M06L  | M06-2X | M06-HF |
|-------------|-------|-------|--------|--------|
| A(20-25-30) | 107.0 | 107.0 | 106.9  | 107.0  |
| A(20-25-31) | 125.5 | 125.2 | 125.0  | 125.3  |
| A(23-21-26) | 114.4 | 114.0 | 114.0  | 106.8  |
| A(23-21-75) | 106.7 | 107.0 | 106.9  | 111.7  |
| A(21-23-28) | 123.2 | 122.8 | 122.5  | 120.6  |
| A(26-21-75) | 107.9 | 108.0 | 108.1  | 110.2  |
| A(21-26-78) | 110.7 | 110.7 | 110.5  | 109.3  |
| A(21-26-79) | 111.9 | 111.8 | 111.6  | 109.6  |
| A(21-26-80) | 111.2 | 111.1 | 110.7  | 111.5  |
| A(27-22-76) | 110.2 | 110.2 | 110.0  | 107.2  |
| A(27-22-77) | 108.2 | 108.4 | 108.4  | 108.8  |
| A(22-27-32) | 110.7 | 110.9 | 110.3  | 109.6  |
| A(22-27-81) | 110.9 | 111.0 | 111.0  | 110.7  |
| A(22-27-82) | 108.5 | 109.2 | 109.3  | 112.4  |
| A(76-22-77) | 104.6 | 104.9 | 105.2  | 106.7  |
| A(23-28-33) | 128.2 | 128.4 | 127.3  | 126.1  |
| A(23-28-83) | 116.1 | 115.8 | 116.5  | 116.6  |
| A(24-29-30) | 110.1 | 110.3 | 110.4  | 110.7  |
| A(24-29-34) | 124.3 | 124.2 | 124.4  | 124.7  |
| A(30-25-31) | 127.4 | 127.8 | 128.0  | 127.7  |
| A(25-30-29) | 106.7 | 106.7 | 106.6  | 106.5  |
| A(25-30-35) | 128.0 | 128.1 | 128.3  | 128.5  |
| A(25-31-36) | 111.5 | 112.0 | 111.5  | 110.6  |
| A(25-31-84) | 110.6 | 110.3 | 110.2  | 110.2  |
| A(25-31-85) | 110.0 | 109.8 | 109.8  | 109.8  |
| A(78-26-79) | 107.6 | 107.6 | 108.0  | 108.6  |
| A(78-26-80) | 106.8 | 107.2 | 107.4  | 108.4  |
| A(79-26-80) | 108.5 | 108.3 | 108.7  | 109.3  |
| A(32-27-81) | 109.9 | 109.4 | 109.1  | 108.8  |
| A(32-27-82) | 110.7 | 110.7 | 110.7  | 107.5  |
| A(27-32-37) | 122.8 | 123.2 | 122.4  | 122.0  |
| A(27-32-38) | 118.4 | 118.0 | 118.3  | 118.3  |
| A(81-27-82) | 106.0 | 105.6 | 106.5  | 107.7  |
| A(33-28-83) | 115.7 | 115.8 | 116.2  | 117.3  |
| A(28-33-39) | 124.9 | 124.4 | 125.2  | 125.8  |
| A(28-33-40) | 125.3 | 125.4 | 124.7  | 124.4  |
| A(30-29-34) | 125.6 | 125.5 | 125.2  | 124.5  |
| A(29-30-35) | 125.2 | 125.2 | 125.0  | 125.0  |
| A(29-34-41) | 128.2 | 127.9 | 127.5  | 126.5  |
| A(29-34-86) | 115.6 | 115.7 | 115.9  | 116.3  |
| A(30-35-87) | 111.8 | 111.8 | 111.5  | 111.0  |
| A(30-35-88) | 111.5 | 111.4 | 111.1  | 110.6  |
| A(30-35-89) | 111.9 | 112.0 | 111.6  | 111.2  |

*Continued on next page*

Table A.2 – Continued from the previous page

|             | M06   | M06L  | M06-2X | M06-HF |
|-------------|-------|-------|--------|--------|
| A(36-31-84) | 109.7 | 109.4 | 109.6  | 109.8  |
| A(36-31-85) | 109.4 | 109.2 | 109.4  | 109.7  |
| A(31-36-90) | 110.4 | 110.4 | 110.1  | 109.6  |
| A(31-36-91) | 110.5 | 110.8 | 110.4  | 109.8  |
| A(31-36-92) | 111.4 | 111.3 | 111.1  | 110.8  |
| A(84-31-85) | 105.6 | 105.9 | 106.2  | 106.6  |
| A(37-32-38) | 118.8 | 118.8 | 119.3  | 119.7  |
| A(32-38-42) | 119.0 | 117.9 | 118.0  | 116.6  |
| A(39-33-40) | 109.9 | 110.2 | 110.1  | 109.8  |
| A(33-39-41) | 107.5 | 106.9 | 107.3  | 107.9  |
| A(33-40-43) | 125.0 | 125.3 | 124.8  | 124.3  |
| A(33-40-44) | 106.9 | 106.8 | 106.8  | 106.7  |
| A(41-34-86) | 116.2 | 116.4 | 116.6  | 117.2  |
| A(34-41-39) | 125.0 | 124.6 | 125.3  | 126.1  |
| A(34-41-44) | 126.1 | 125.9 | 125.9  | 125.7  |
| A(87-35-88) | 107.1 | 107.2 | 107.4  | 107.7  |
| A(87-35-89) | 106.9 | 106.8 | 107.4  | 108.1  |
| A(88-35-89) | 107.3 | 107.4 | 107.6  | 108.0  |
| A(90-36-91) | 107.5 | 107.6 | 107.8  | 108.3  |
| A(90-36-92) | 108.4 | 108.3 | 108.7  | 109.1  |
| A(91-36-92) | 108.5 | 108.4 | 108.6  | 109.2  |
| A(38-42-45) | 108.4 | 107.7 | 107.8  | 107.1  |
| A(38-42-93) | 110.1 | 109.6 | 110.1  | 108.7  |
| A(38-42-94) | 109.4 | 108.7 | 109.4  | 109.4  |
| A(39-41-44) | 109.0 | 109.5 | 108.8  | 108.2  |
| A(43-40-44) | 128.1 | 127.8 | 128.3  | 128.9  |
| A(40-43-95) | 110.8 | 110.8 | 110.3  | 109.7  |
| A(40-43-96) | 112.4 | 112.5 | 112.1  | 111.4  |
| A(40-43-97) | 111.6 | 111.8 | 111.1  | 110.3  |
| A(40-44-41) | 106.9 | 106.6 | 107.0  | 107.4  |
| A(40-44-46) | 128.9 | 129.1 | 128.6  | 128.5  |
| A(41-44-46) | 124.2 | 124.2 | 124.4  | 124.1  |
| A(45-42-93) | 110.2 | 110.9 | 110.7  | 111.8  |
| A(45-42-94) | 110.9 | 111.9 | 110.7  | 110.3  |
| A(42-45-47) | 124.3 | 124.1 | 123.5  | 122.8  |
| A(42-45-98) | 116.5 | 116.7 | 116.8  | 116.9  |
| A(93-42-94) | 107.9 | 108.0 | 108.2  | 109.4  |
| A(95-43-96) | 107.2 | 106.8 | 107.7  | 108.5  |
| A(95-43-97) | 107.6 | 107.7 | 108.1  | 108.7  |
| A(96-43-97) | 107.1 | 107.0 | 107.5  | 108.2  |
| A(44-46-48) | 126.5 | 127.2 | 125.1  | 123.9  |
| A(44-46-99) | 115.7 | 115.4 | 116.1  | 116.3  |
| A(47-45-98) | 119.1 | 119.1 | 119.7  | 120.3  |

*Continued on next page*

Table A.2 – Continued from the previous page

|               | M06   | M06L  | M06-2X | M06-HF |
|---------------|-------|-------|--------|--------|
| A(45-47-49)   | 122.5 | 122.3 | 122.1  | 121.7  |
| A(45-47-50)   | 121.2 | 121.4 | 121.6  | 121.9  |
| A(48-46-99)   | 117.8 | 117.4 | 118.8  | 119.8  |
| A(46-48-100)  | 121.1 | 120.8 | 121.2  | 121.3  |
| A(46-48-101)  | 122.5 | 122.8 | 121.9  | 121.6  |
| A(49-47-50)   | 116.3 | 116.3 | 116.2  | 116.3  |
| A(47-49-102)  | 110.9 | 111.2 | 110.5  | 109.8  |
| A(47-49-103)  | 111.4 | 111.4 | 111.1  | 111.0  |
| A(47-49-104)  | 110.9 | 110.9 | 110.6  | 110.2  |
| A(47-50-51)   | 112.6 | 113.6 | 112.1  | 111.2  |
| A(47-50-105)  | 110.0 | 110.0 | 110.0  | 110.0  |
| A(47-50-106)  | 109.5 | 108.8 | 109.4  | 109.5  |
| A(100-48-101) | 116.4 | 116.4 | 116.8  | 117.2  |
| A(102-49-103) | 108.7 | 108.9 | 109.1  | 109.6  |
| A(102-49-104) | 107.9 | 107.7 | 108.2  | 108.4  |
| A(103-49-104) | 106.9 | 106.6 | 107.3  | 107.9  |
| A(51-50-105)  | 109.2 | 109.6 | 109.4  | 109.2  |
| A(51-50-106)  | 108.6 | 108.0 | 108.6  | 109.0  |
| A(50-51-52)   | 111.6 | 111.5 | 111.6  | 111.3  |
| A(50-51-107)  | 108.9 | 109.4 | 108.9  | 108.5  |
| A(50-51-108)  | 109.3 | 109.1 | 109.1  | 109.2  |
| A(105-50-106) | 106.9 | 106.5 | 107.2  | 107.9  |
| A(52-51-107)  | 109.8 | 110.0 | 109.8  | 110.1  |
| A(52-51-108)  | 110.1 | 109.9 | 110.1  | 109.8  |
| A(51-52-53)   | 114.7 | 114.6 | 114.2  | 113.8  |
| A(51-52-109)  | 108.7 | 109.0 | 108.8  | 108.9  |
| A(51-52-110)  | 109.4 | 109.1 | 109.3  | 109.2  |
| A(107-51-108) | 106.9 | 106.7 | 107.2  | 107.9  |
| A(53-52-109)  | 108.6 | 108.8 | 108.6  | 108.5  |
| A(53-52-110)  | 108.8 | 108.7 | 108.9  | 109.0  |
| A(52-53-54)   | 111.1 | 111.1 | 111.3  | 111.0  |
| A(52-53-55)   | 109.3 | 109.2 | 109.3  | 109.3  |
| A(52-53-111)  | 108.2 | 108.4 | 108.2  | 108.1  |
| A(109-52-110) | 106.3 | 106.3 | 106.7  | 107.3  |
| A(54-53-55)   | 111.1 | 111.3 | 111.2  | 111.1  |
| A(54-53-111)  | 108.8 | 108.7 | 108.7  | 108.9  |
| A(53-54-112)  | 111.8 | 111.7 | 111.4  | 111.4  |
| A(53-54-113)  | 111.9 | 111.7 | 111.6  | 111.1  |
| A(53-54-114)  | 110.1 | 110.4 | 110.1  | 109.7  |
| A(55-53-111)  | 108.2 | 108.2 | 108.1  | 108.3  |
| A(53-55-56)   | 114.8 | 114.6 | 114.4  | 113.7  |
| A(53-55-115)  | 108.7 | 108.6 | 108.6  | 108.7  |
| A(53-55-116)  | 108.8 | 108.8 | 108.9  | 109.0  |

*Continued on next page*



Table A.2 – Continued from the previous page

|               | M06   | M06L  | M06-2X | M06-HF |
|---------------|-------|-------|--------|--------|
| A(112-54-113) | 106.8 | 107.1 | 107.2  | 107.5  |
| A(112-54-114) | 108.0 | 108.0 | 108.2  | 108.4  |
| A(113-54-114) | 108.0 | 107.9 | 108.2  | 108.6  |
| A(56-55-115)  | 108.6 | 108.9 | 108.8  | 108.3  |
| A(56-55-116)  | 109.4 | 109.4 | 109.3  | 109.6  |
| A(55-56-57)   | 111.6 | 111.9 | 111.6  | 111.3  |
| A(55-56-117)  | 109.5 | 109.5 | 109.4  | 109.1  |
| A(55-56-118)  | 109.7 | 109.7 | 109.6  | 109.8  |
| A(115-55-116) | 106.3 | 106.2 | 106.7  | 107.3  |
| A(57-56-117)  | 109.4 | 109.4 | 109.3  | 109.4  |
| A(57-56-118)  | 109.7 | 109.6 | 109.7  | 109.5  |
| A(56-57-58)   | 114.9 | 114.4 | 114.5  | 113.9  |
| A(56-57-119)  | 108.7 | 108.9 | 108.7  | 108.7  |
| A(56-57-120)  | 109.3 | 109.4 | 109.3  | 109.3  |
| A(117-56-118) | 106.7 | 106.6 | 107.1  | 107.8  |
| A(58-57-119)  | 108.6 | 108.6 | 108.5  | 108.5  |
| A(58-57-120)  | 108.7 | 108.9 | 108.9  | 109.0  |
| A(57-58-59)   | 109.2 | 109.5 | 109.2  | 109.2  |
| A(57-58-60)   | 111.2 | 111.2 | 111.3  | 111.1  |
| A(57-58-121)  | 108.3 | 108.1 | 108.2  | 108.2  |
| A(119-57-120) | 106.2 | 106.2 | 106.6  | 107.2  |
| A(59-58-60)   | 111.2 | 111.2 | 111.2  | 111.1  |
| A(59-58-121)  | 108.1 | 108.1 | 108.1  | 108.3  |
| A(58-59-61)   | 114.9 | 114.4 | 114.5  | 114.0  |
| A(58-59-122)  | 108.5 | 108.6 | 108.5  | 108.6  |
| A(58-59-123)  | 108.8 | 109.0 | 108.9  | 109.0  |
| A(60-58-121)  | 108.7 | 108.6 | 108.7  | 108.8  |
| A(58-60-124)  | 111.7 | 111.6 | 111.5  | 111.2  |
| A(58-60-125)  | 111.7 | 111.7 | 111.5  | 111.2  |
| A(58-60-126)  | 110.2 | 110.4 | 110.1  | 109.8  |
| A(61-59-122)  | 108.7 | 108.8 | 108.7  | 108.6  |
| A(61-59-123)  | 109.3 | 109.5 | 109.3  | 109.2  |
| A(59-61-62)   | 111.3 | 111.6 | 111.2  | 110.7  |
| A(59-61-127)  | 109.0 | 109.0 | 109.0  | 108.9  |
| A(59-61-128)  | 109.7 | 109.8 | 109.8  | 109.6  |
| A(122-59-123) | 106.3 | 106.2 | 106.7  | 107.2  |
| A(124-60-125) | 107.0 | 107.2 | 107.2  | 107.4  |
| A(124-60-126) | 108.1 | 107.9 | 108.2  | 108.5  |
| A(125-60-126) | 108.0 | 107.9 | 108.2  | 108.6  |
| A(62-61-127)  | 110.1 | 110.0 | 110.0  | 110.2  |
| A(62-61-128)  | 109.7 | 109.6 | 109.6  | 109.4  |
| A(61-62-63)   | 115.5 | 114.8 | 114.8  | 114.6  |
| A(61-62-129)  | 108.7 | 108.9 | 108.8  | 108.8  |

*Continued on next page*

Table A.2 – Continued from the previous page

|               | M06   | M06L  | M06-2X | M06-HF |
|---------------|-------|-------|--------|--------|
| A(61-62-130)  | 108.7 | 108.9 | 108.8  | 108.5  |
| A(127-61-128) | 106.9 | 106.7 | 107.2  | 108.0  |
| A(63-62-129)  | 108.6 | 108.8 | 108.9  | 108.7  |
| A(63-62-130)  | 108.6 | 108.8 | 108.7  | 108.6  |
| A(62-63-64)   | 112.1 | 111.7 | 111.8  | 112.0  |
| A(62-63-65)   | 111.9 | 111.6 | 111.7  | 111.8  |
| A(62-63-131)  | 106.6 | 106.9 | 106.9  | 106.8  |
| A(129-62-130) | 106.3 | 106.3 | 106.6  | 107.3  |
| A(64-63-65)   | 110.5 | 110.5 | 110.5  | 110.3  |
| A(64-63-131)  | 107.7 | 107.9 | 107.8  | 107.9  |
| A(63-64-132)  | 111.4 | 111.4 | 111.1  | 110.9  |
| A(63-64-133)  | 111.4 | 111.1 | 111.1  | 110.9  |
| A(63-64-134)  | 110.7 | 111.0 | 110.6  | 110.2  |
| A(65-63-131)  | 107.8 | 108.0 | 108.0  | 107.8  |
| A(63-65-135)  | 111.4 | 111.4 | 111.2  | 110.8  |
| A(63-65-136)  | 111.2 | 111.1 | 110.9  | 110.9  |
| A(63-65-137)  | 110.8 | 111.0 | 110.7  | 110.3  |
| A(132-64-133) | 108.0 | 107.9 | 108.2  | 108.6  |
| A(132-64-134) | 107.9 | 107.9 | 108.1  | 108.3  |
| A(133-64-134) | 107.3 | 107.4 | 107.6  | 107.9  |
| A(135-65-136) | 108.0 | 107.9 | 108.1  | 108.5  |
| A(135-65-137) | 107.9 | 107.9 | 108.1  | 108.4  |
| A(136-65-137) | 107.4 | 107.4 | 107.7  | 107.9  |

Table A.3: Transition assignments for the TD-DFT calculation of the UV-Vis spectrum of chlorophyll a with the M06 density functional and the MIDIY and DGDZVP basis sets

| #  | nm    | (f)    | Assignments                 |
|----|-------|--------|-----------------------------|
| 1  | 613.6 | 0.6766 | H→L(+95%)                   |
| 2  | 546.2 | 0.2313 | H-1→L(+88%) H→L+1(+11%)     |
| 3  | 424.0 | 1.2232 | H→L+1(+87%) H-1→L(10%)      |
| 4  | 409.3 | 0.3779 | H-2→L(+75%) H-1→L+1(+16%)   |
| 5  | 401.6 | 0.9059 | H-1→L+1(+77%) H-2→L(17%)    |
| 6  | 380.1 | 0.0211 | H-3→L(+95%)                 |
| 7  | 371.7 | 0.0036 | H-5→L(+83%) H-5→L+2(10%)    |
| 8  | 339.6 | 0.2017 | H-6→L(+96%)                 |
| 9  | 326.2 | 0.0478 | H-3→L+1(+67%) H-2→L+1(+27%) |
| 10 | 322.9 | 0.0998 | H→L+2(+91%)                 |

Table A.4: Transition assignments for the TD-DFT calculation of the UV-Vis spectrum of chlorophyll a with the M06L density functional and the MIDIY and DGDZVP basis sets

| #  | nm    | (f)    | Assignments               |
|----|-------|--------|---------------------------|
| 1  | 627.5 | 0.7441 | H→L(+95%)                 |
| 2  | 592.1 | 0.1920 | H-1→L(+89%) H→L+1(+9%)    |
| 3  | 492.8 | 0.0167 | H-2→L(+97%)               |
| 4  | 461.5 | 0.0592 | H-3→L(+78%) H-4→L(+16%)   |
| 5  | 458.6 | 0.0011 | H-4→L(+81%) H-3→L(18%)    |
| 6  | 448.1 | 0.7070 | H→L+1(+65%) H-1→L+1(19%)  |
|    |       |        | H-1→L(6%)                 |
| 7  | 442.1 | 0.0021 | H-5→L(+100%)              |
| 8  | 437.4 | 0.9063 | H-1→L+1(+68%) H→L+1(+16%) |
| 9  | 386.6 | 0.0645 | H-7→L(+74%) H-6→L(+24%)   |
| 10 | 382.5 | 0.1629 | H-6→L(+68%) H-7→L(25%)    |

Table A.5: Transition assignments for the TD-DFT calculation of the UV-Vis spectrum of chlorophyll a with the M06-2X density functional and the MIDIY and DGDZVP basis sets

| #  | nm    | (f)    | Assignments                               |
|----|-------|--------|-------------------------------------------|
| 1  | 597.3 | 0.6586 | H→L(+93%) H-1→L+1(+6%)                    |
| 2  | 487.9 | 0.2538 | H-1→L(+85%) H→L+1(13%)                    |
| 3  | 399.1 | 1.6096 | H→L+1(+85%) H-1→L(+13%)                   |
| 4  | 364.9 | 1.4395 | H-1→L+1(+88%) H→L(6%)                     |
| 5  | 343.5 | 0.0506 | H-2→L(+78%) H-3→L(8%)<br>H-2→L+1(+7%)     |
| 6  | 320.8 | 0.0194 | H-3→L(+77%) H-2→L(+10%)                   |
| 7  | 318.3 | 0.0010 | H-7→L(+41%) H-7→L+2(+36%)                 |
| 8  | 294.9 | 0.1494 | H-5→L(+83%)                               |
| 9  | 282.7 | 0.0926 | H→L+2(+75%) H-1→L+2(13%)<br>H-5→L(+5%)    |
| 10 | 279.3 | 0.0864 | H-3→L+1(+59%) H-2→L+1(+29%)<br>H-3→L(+7%) |

Table A.6: Transition assignments for the TD-DFT calculation of the UV-Vis spectrum of chlorophyll a with the M06-HF density functional and the MIDIY and DGDZVP basis sets

| #  | nm    | (f)    | Assignments                                                          |
|----|-------|--------|----------------------------------------------------------------------|
| 1  | 564.5 | 0.5252 | H→L(+86%) H-1→L+1(9%)                                                |
| 2  | 409.0 | 1.1094 | H-1→L(+85%) H-1→L+1(5%)                                              |
| 3  | 356.6 | 0.9154 | H→L+1(+85%) H-1→L+1(+8%)                                             |
| 4  | 321.0 | 1.5282 | H-1→L+1(+64%) H→L(+8%)<br>H-1→L(+7%) H→L+1(7%)                       |
| 5  | 318.5 | 0.0730 | H-9→L+3(20%) H-10→L+3(13%)<br>H-9→L(+7%) H-9→L+4(+5%)<br>H-10→L(+5%) |
| 6  | 284.5 | 0.0931 | H-2→L(+45%) H-3→L(25%)<br>H-3→L+1(+18%)                              |
| 7  | 276.9 | 0.1515 | H-3→L(+40%) H-2→L(+32%)<br>H-2→L+1(+18%)                             |
| 8  | 252.9 | 0.0946 | H-5→L(+49%) H→L+3(+14%)<br>H-5→L+1(+9%) H→L+2(7%)                    |
| 9  | 244.6 | 0.0048 | H→L+2(+80%) H→L+3(+9%)                                               |
| 10 | 239.0 | 0.0880 | H→L+3(+32%) H-5→L(28%)<br>H-1→L+2(+14%) H-8→L(+7%)                   |
